# Supplementary material for: KDEL Receptor Trafficking to the Plasma Membrane is Regulated by ACBD3 and Rab4-GTP
Source: Preprints.org preprint supplement (doi:10.20944/preprints202212.0254.v1), 2022-12-14
Supplement: Supplementary file 1 [file supplementary]

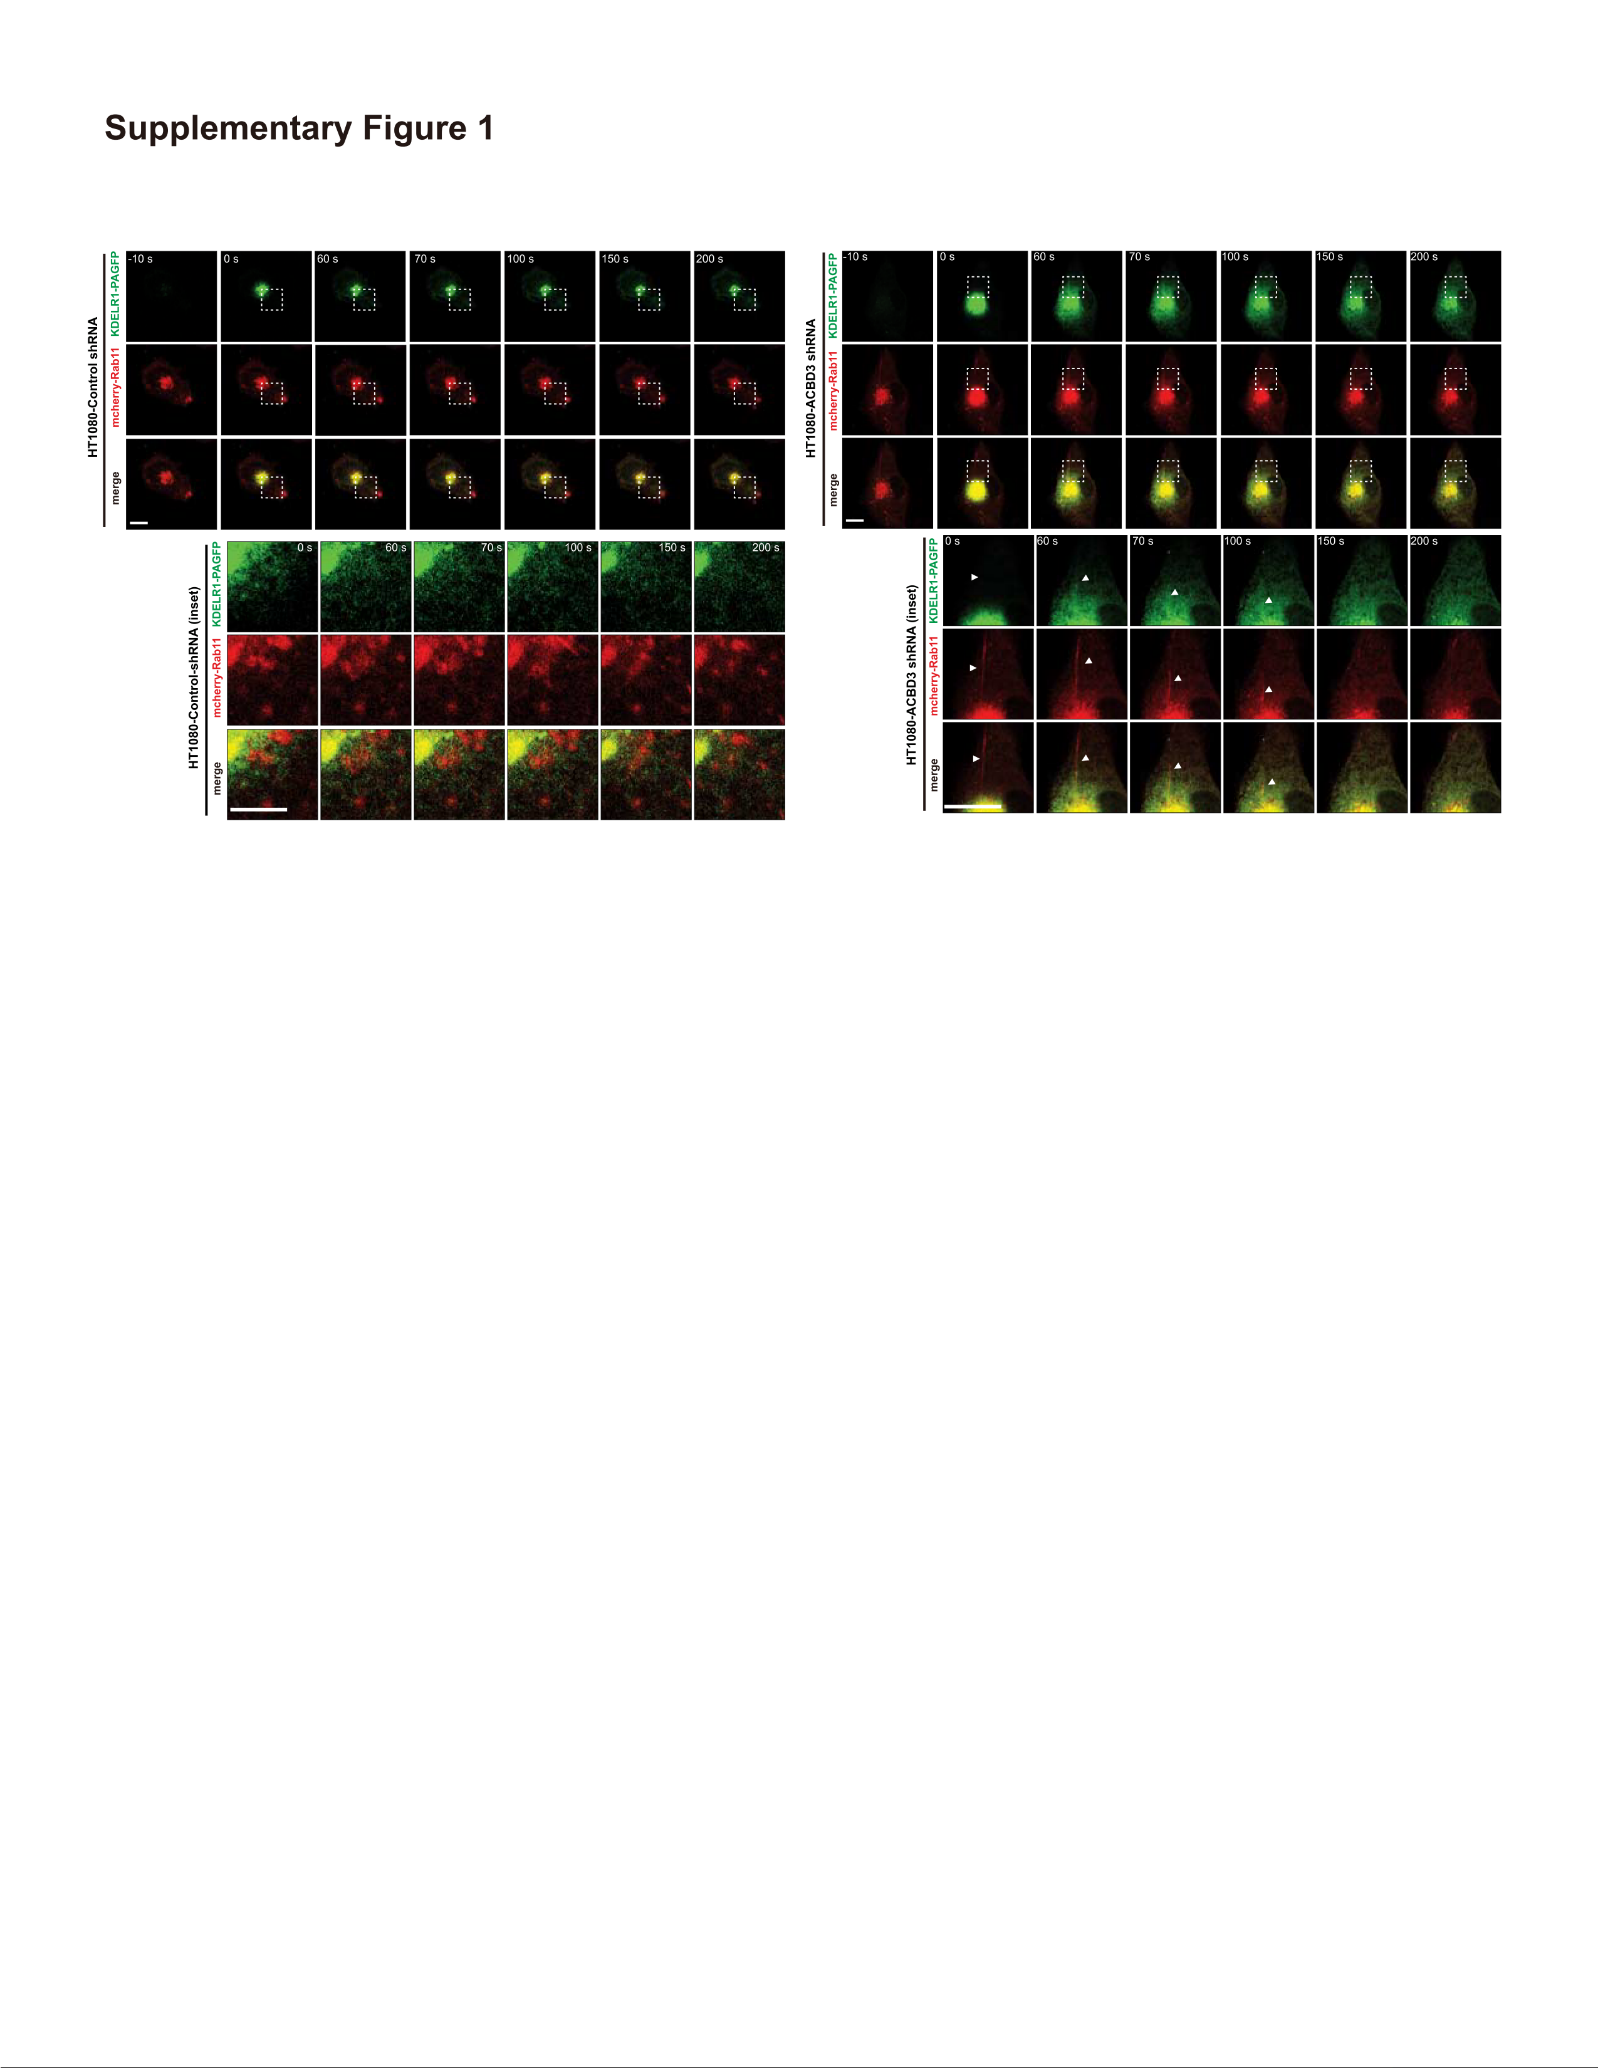


**Supplementary Figure 1.** ACBD3 depletion results in increased trafficking of KDEL receptor to the PM via Rab4-positive tubular carriers at the Golgi. To examine the post-Golgi trafficking itineraries of KDEL receptor to the PM, WT or ACBD3-depleted HT1080 cells were co-transfected with photoactivatable KDELR1-PA-GFP and mCherry-Rab11A plasmids for 18 hours. The KDELR1-PA-GFP in the Golgi were then activated by selecting an ROI of mCherry-Rab11A perinuclear region for intense 405 nm laser irradiation and the transport out of the Golgi are monitored by live cell imaging acquired every 5 seconds for 5 min. Imaging sequences prior to photoactivation (-10 seconds), immediately after photoactivation (0 second) and the indicated time points following photoactivation are presented here. Magnified regions of interest (indicated by white boxes) from WT and ACBD3-KO cells at the indicated time points shows Golgi-derived tubules which are highlighted by white arrowheads. Scale bars = 5 µm.
